# Supplementary material
Source: publisher figshare collection journal article supplement (https://acs.figshare.com/ndownloader/files/4139254)

## Supplemental Material:

**Figure S1:** pH dependence of H228A and H11A SsuD activity. Reactions were initiated by the addition of NADPH (500  $\mu\text{M}$ ) into a reaction mixture containing H228A SsuD (0.2  $\mu\text{M}$ ), SsuE (0.6  $\mu\text{M}$ ), FMN (2  $\mu\text{M}$ ), and a range of 1-octanesulfonic acid concentrations (10–5000  $\mu\text{M}$ ) in either 50 mM Bis-Tris (pH range of 5.8–7.2), 50 mM Tris-HCl (pH range of 7.2–9.0), or 50 mM glycine (pH range of 9.0–10.0) and 100 mM sodium chloride at 25°C. pH dependence of H228A SsuD (●) A:  $k_{\text{cat}}$  values B:  $k_{\text{cat}}/K_{\text{m}}$  values; pH dependence of H11A SsuD (▲) C:  $k_{\text{cat}}$  values D:  $k_{\text{cat}}/K_{\text{m}}$  values. Each point is the average of at least three separate experiments. Solid lines for A and C are fits of the data to eq. 3:

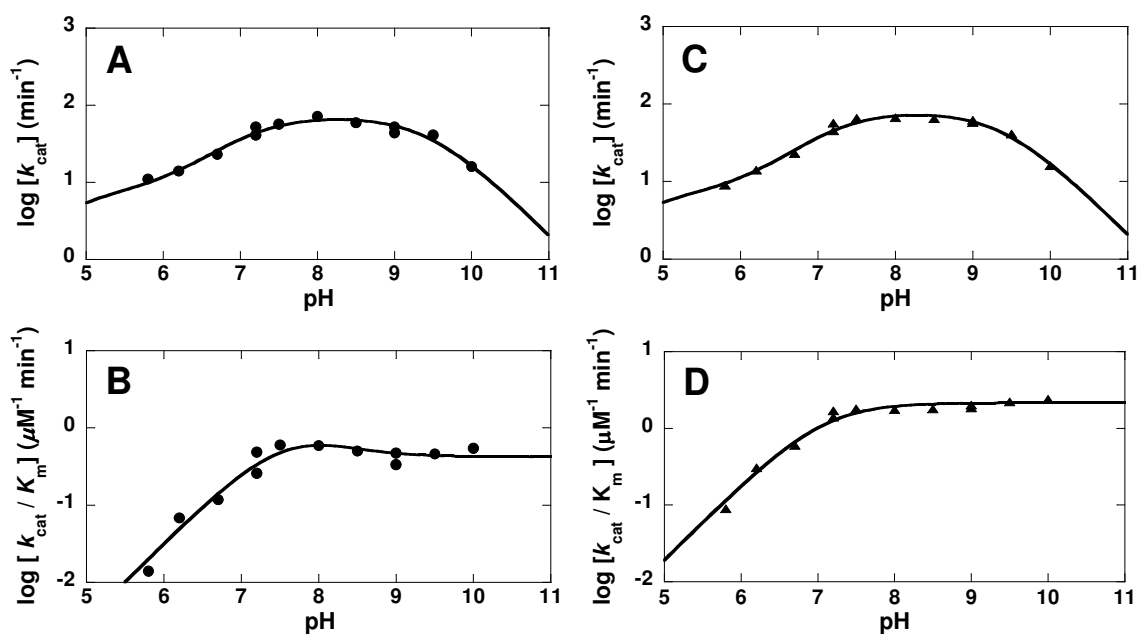

**Figure S2:** Emission intensity measurements at 344 nm were measured using an excitation wavelength at 280 nm. The change in the emission intensity at 344 nm following each addition of FMNH<sub>2</sub> was converted to the estimated concentration of bound FMNH<sub>2</sub> to SsuD (eq 4) and plotted against the concentration of free FMNH<sub>2</sub>. A: The titration of R226A SsuD enzyme (0.5  $\mu$ M) with FMNH<sub>2</sub> (0.26-8.26  $\mu$ M). B: The titration of R226K SsuD enzyme (0.5  $\mu$ M) with FMNH<sub>2</sub> (0.26-8.26  $\mu$ M). The solid line in each plot represents the fit of the titration curve to eq 5. Each titration was performed in triplicate.

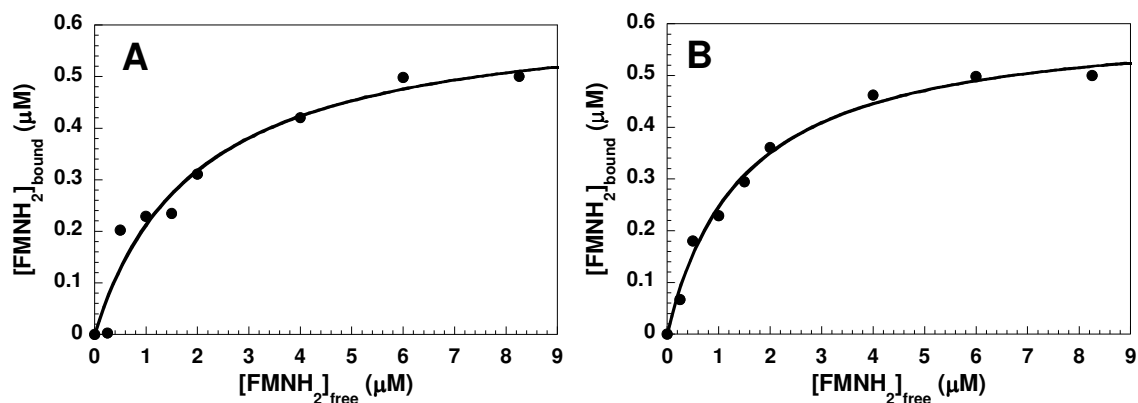

**Figure S3:** Emission intensity measurements at 344 nm were measured using an excitation wavelength at 280 nm. The change in the emission intensity at 344 nm following each addition of 1-octanesulfonate was converted to the estimated concentration of bound 1-octanesulfonate to SsuD-FMNH<sub>2</sub> enzyme complex (eq 4) and plotted against the concentration of free octanesulfonate. A: The titration of R226A SsuD-FMNH<sub>2</sub> enzyme complex. R226A SsuD (1  $\mu$ M) was premixed with FMNH<sub>2</sub> (2  $\mu$ M) and titrated with 1-octanesulfonate (0.25-108  $\mu$ M). B: The titration of R226K SsuD-FMNH<sub>2</sub> enzyme complex. R226K SsuD (1  $\mu$ M) was premixed with FMNH<sub>2</sub> (2  $\mu$ M) and titrated with 1-octanesulfonate (0.25-108  $\mu$ M). The solid line in each plot represents the fit of the titration curve to eq 5. Each titration was performed in triplicate.

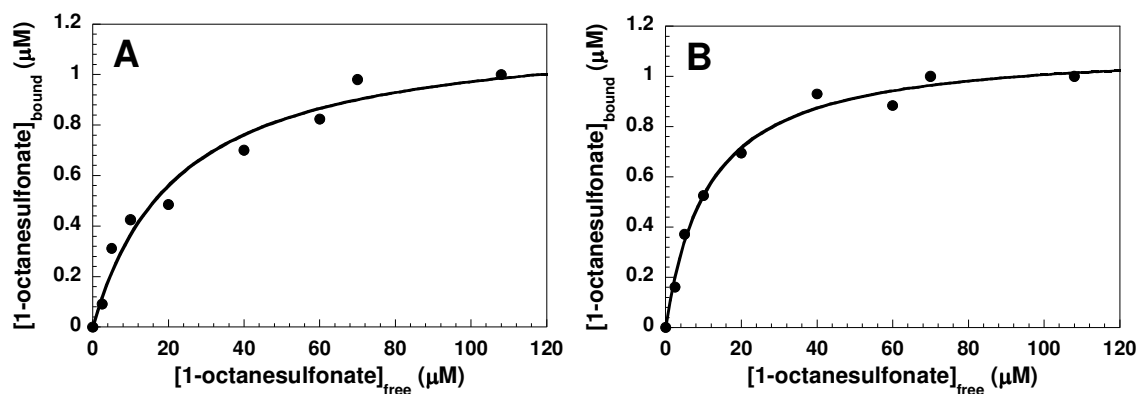

Supplement: Supplementary file 1 [file 4139254]
